# Supplementary material for: The tumor suppressive miR-302c-3p inhibits migration and invasion of hepatocellular carcinoma cells by targeting TRAF4
Source: PubMed Central journal article supplement — J Cancer. 2018 Jun 23;9(15):2693–701. doi: 10.7150/jca.25569 (PMC6072805; doi:10.7150/jca.25569), 2018-06-23

**Supplementary Figure 1. miR-302c-3p inhibits proliferation of HCC cells.**

MHCC97H and HepG2 cells that were transfected with miR-302c-3p mimics and inhibitors, respectively, were subjected to CCK-8 assay. miR-302c-3p knockdown prohibited while miR-302c-3p knockdown facilitated proliferation of HCC cells. n=three independent experiments, \*P<0.05 by Student's t-test.

**Supplementary Figure 2. Down-regulation of miR-302c-3p contributes to migration and invasion of HCC cells by promoting TRAF4/AKT-induced EMT.**

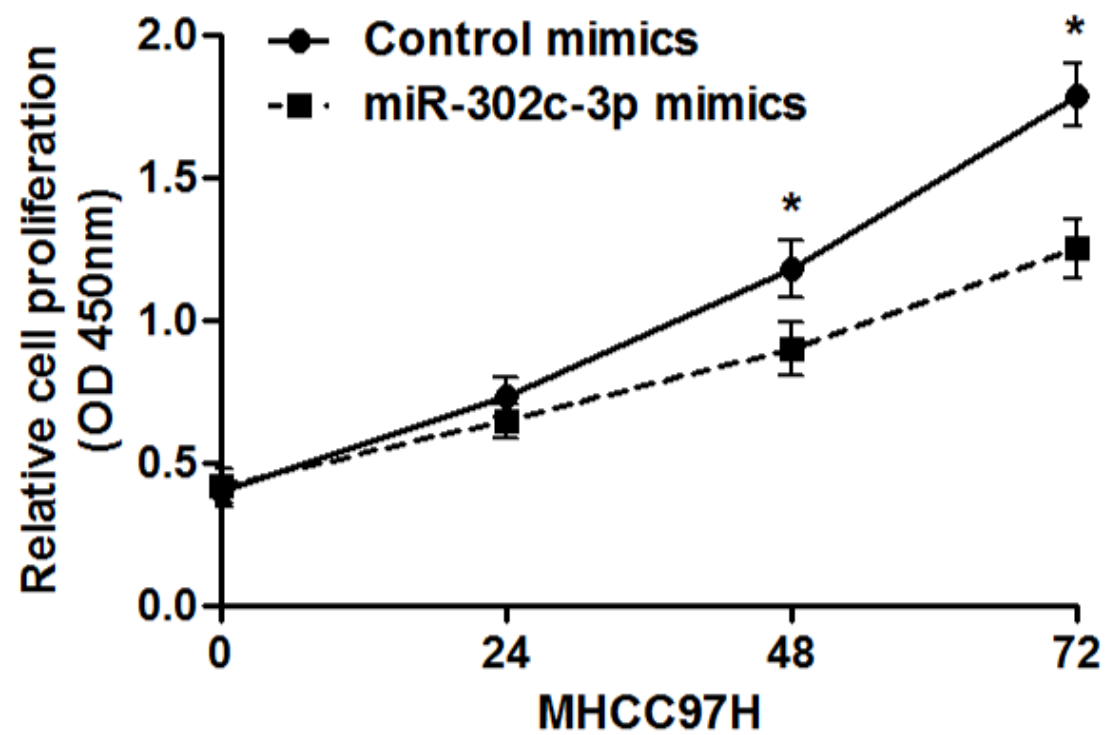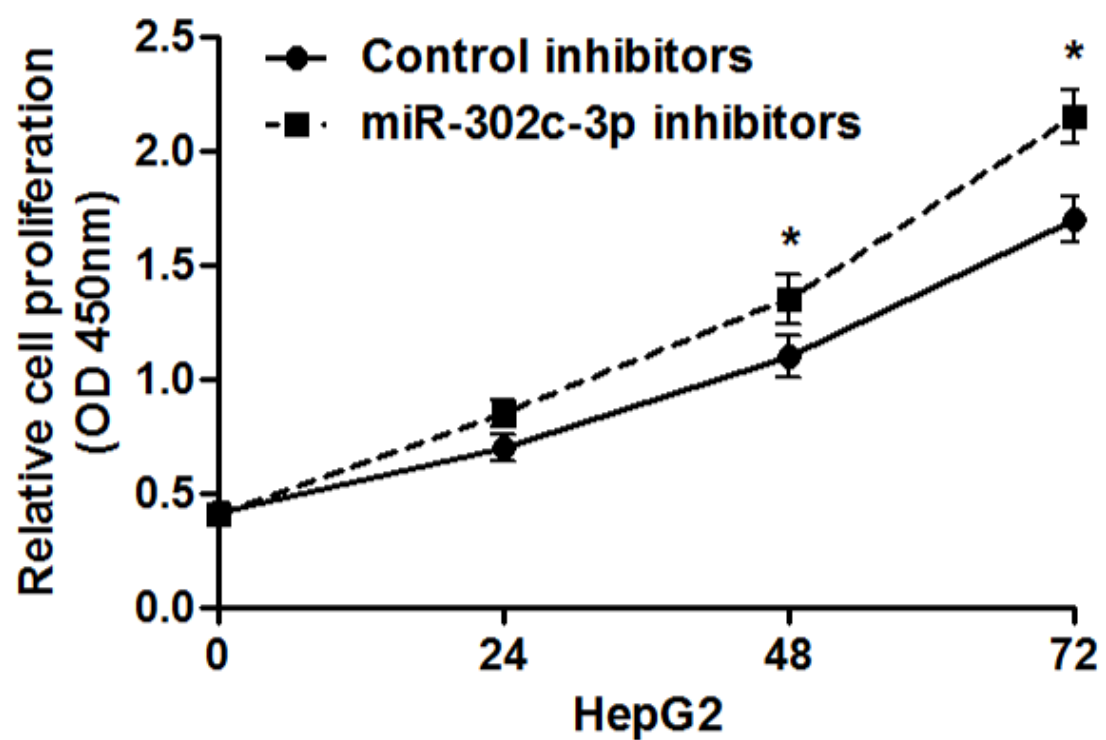

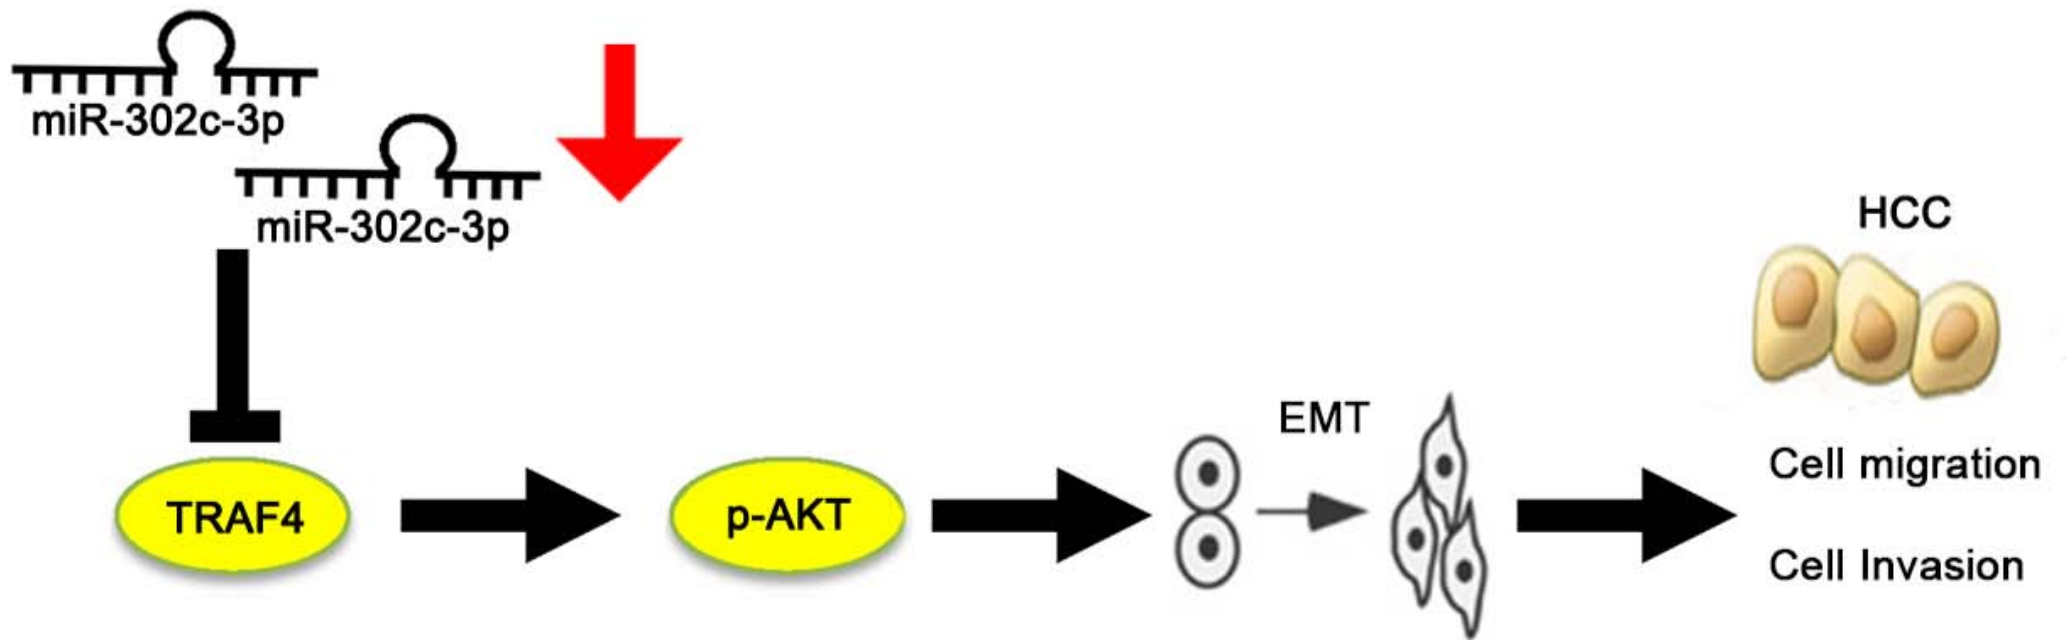

Supplement: jcav09p2693s1.pdf [file jcav09p2693s1.pdf]
